# Supplementary material
Source: MDPI journal article supplement (https://www.mdpi.com/2304-6740/10/9/123)
Supplement: s1 [file s1]

# Electronic Supplementary Material

## Structure and Vibrational Spectra of Pyridine Solvated Solid Bis(Pyridinesilver(I) Perchlorate, $[\text{Agpy}_2\text{ClO}_4]\cdot 0.5\text{py}$

Nóra V. May <sup>1</sup>, Niloofar Bayat <sup>1,2</sup>, Kende Attila Béres <sup>1,3</sup>, Petra Bombicz <sup>1</sup>, Vladimir M. Petruševski <sup>4</sup>, György Lendvay <sup>1</sup>, Attila Farkas <sup>5</sup> and László Kótai <sup>1,6,\*</sup>

<sup>1</sup> Research Centre for Natural Sciences, Hungarian Academy of Sciences, Magyar Tudósok krt. 2., 1117 Budapest, Hungary

<sup>2</sup> Department of Inorganic and Analytical Chemistry, Budapest University of Technology and Economics, Műgyetem rkp. 3., 1111 Budapest, Hungary

<sup>3</sup> Institute of Chemistry, ELTE Eötvös Loránd University, Pázmány Péter s. 1/A, 1117 Budapest, Hungary

<sup>4</sup> Faculty of Natural Sciences and Mathematics, Ss. Cyril and Methodius University, 1000, Skopje, North Macedonia

<sup>5</sup> Department of Organic Chemistry and Technology, Budapest University of Technology and Economics, Műgyetem rkp. 3., 1111 Budapest, Hungary

<sup>6</sup> Deuton-X Ltd., Selmeci u. 89, 2030, Érd, Hungary

\* Correspondence: kotai.laszlo@ttk.hu

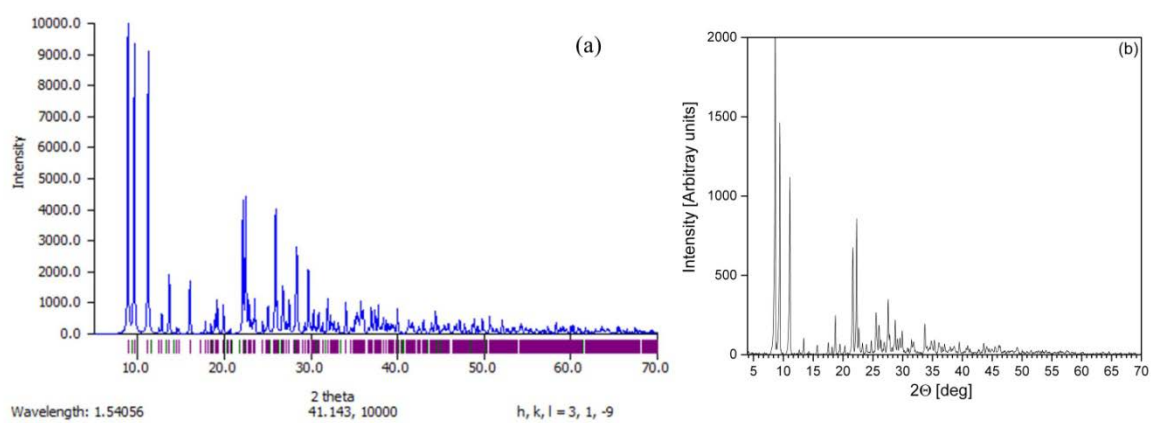

**Figure S1.** Comparison of the experimental (a) and calculated (from SXRD data) (b) powder XRDs of compound 1.

**Table S1.** Crystal data and details of the structure determination and refinement of compound **1**.

|                                        |                                                                                                              |
|----------------------------------------|--------------------------------------------------------------------------------------------------------------|
| Empirical formula                      | C <sub>25</sub> H <sub>25</sub> Ag <sub>2</sub> Cl <sub>2</sub> N <sub>5</sub> O <sub>8</sub> ;              |
| Moiety formula                         | 2(C <sub>10</sub> H <sub>10</sub> N <sub>2</sub> Ag).2(ClO <sub>4</sub> ). (C <sub>5</sub> H <sub>5</sub> N) |
| Formula weight                         | 810.14                                                                                                       |
| Temperature                            | 103(2)K                                                                                                      |
| Radiation and wavelength               | Mo-K $\alpha$ , $\lambda$ =0.71073Å                                                                          |
| Crystal system                         | monoclinic                                                                                                   |
| Space group                            | C 2/c                                                                                                        |
| Unit cell dimensions                   | $a$ =19.1093(16)Å, $b$ =7.7016(8)Å, $c$ =20.6915(19)Å<br>$\alpha$ = $\gamma$ =90° $\beta$ =105.515(7)°       |
| Volume                                 | 2934.2(5)Å <sup>3</sup>                                                                                      |
| Z                                      | 4                                                                                                            |
| Density (calculated)                   | 1.834 Mg/m <sup>3</sup>                                                                                      |
| Absorption coefficient, $\mu$          | 1.572 mm <sup>-1</sup>                                                                                       |
| $F(000)$                               | 1608                                                                                                         |
| Crystal colour, description            | colourless, block                                                                                            |
| Crystal size                           | 0.5 x 0.3 x 0.3 mm                                                                                           |
| Absorption correction                  | multi-scan                                                                                                   |
| Max. and min. transmission             | 0.717 1.000                                                                                                  |
| $\theta$ –range for data collection    | 3.141° $\leq \theta \leq$ 27.463°                                                                            |
| Index ranges                           | -24 $\leq h \leq$ 24; -9 $\leq k \leq$ 9; -26 $\leq l \leq$ 26                                               |
| Reflections collected                  | 58650                                                                                                        |
| Completeness to 2 $\theta$             | 0.998                                                                                                        |
| Independent reflections                | 3347 [ $R(\text{int})$ =0.0305]                                                                              |
| Reflections $I > 2\sigma(I)$           | 3257                                                                                                         |
| Refinement method                      | full-matrix least-squares on $F^2$                                                                           |
| Data / restraints / parameters         | 3347 /0 /191                                                                                                 |
| Goodness-of-fit on $F^2$               | 1.205                                                                                                        |
| Final $R$ indices [ $I > 2\sigma(I)$ ] | $R1$ =0.0253, $wR2$ =0.0600                                                                                  |
| $R$ indices (all data)                 | $R1$ =0.0265, $wR2$ =0.0606                                                                                  |
| Max. and mean shift/esd                | 0.001; 0.000                                                                                                 |
| Largest diff. peak and hole            | 0.916; -0.623 e.Å <sup>-3</sup>                                                                              |

**Table S2.** Atomic coordinates ( $\times 10^4$ ) and equivalent isotropic displacement parameters ( $\text{\AA}^2 \times 10^3$ ) of compound **1**.  $U(\text{eq})$  is defined as one third of the trace of the orthogonalized  $U_{ij}$  tensor.

|     | <i>x</i>  | <i>y</i>  | <i>z</i>  | <i>U</i> (eq) |
|-----|-----------|-----------|-----------|---------------|
| Ag1 | 2127.0(2) | 5858.3(2) | 4476.1(2) | 25(1)         |
| Cl1 | 3460.7(3) | 3826.5(6) | 5890.1(2) | 20(1)         |
| O1  | 4166.4(9) | 4045(2)   | 6347.7(9) | 32(1)         |
| N1  | 1328(1)   | 6107(2)   | 5037(1)   | 23(1)         |
| O2  | 3104(1)   | 5485(2)   | 5770(1)   | 42(1)         |
| N2  | 2761(1)   | 5886(2)   | 3753.8(9) | 23(1)         |
| O3  | 3533(1)   | 3113(3)   | 5275(1)   | 49(1)         |
| N3  | 5000      | 7157(4)   | 7500      | 37(1)         |
| O4  | 3032(1)   | 2669(2)   | 6173.3(9) | 36(1)         |
| C11 | 764(1)    | 7201(3)   | 4832(1)   | 26(1)         |
| C12 | 252(1)    | 7442(3)   | 5187(1)   | 30(1)         |
| C13 | 321(1)    | 6536(3)   | 5775(1)   | 31(1)         |
| C14 | 898(1)    | 5399(3)   | 5987(1)   | 29(1)         |
| C15 | 1387(1)   | 5209(3)   | 5607(1)   | 25(1)         |
| C21 | 3312(1)   | 4778(3)   | 3802(1)   | 27(1)         |
| C22 | 3702(1)   | 4689(4)   | 3327(1)   | 31(1)         |
| C23 | 3511(1)   | 5761(3)   | 2774(1)   | 30(1)         |
| C24 | 2943(1)   | 6907(4)   | 2718(1)   | 32(1)         |
| C25 | 2588(1)   | 6941(3)   | 3220(1)   | 29(1)         |
| C31 | 4438(1)   | 8061(3)   | 7068(1)   | 27(1)         |
| C32 | 4434(1)   | 9867(3)   | 7075(1)   | 31(1)         |
| C33 | 5000      | 10770(5)  | 7500      | 31(1)         |

**Table S3.** Hydrogen coordinates ( $\times 10^4$ ) and isotropic displacement parameters ( $\text{\AA}^2 \times 10^3$ ) of compound **1**.

|     | <i>x</i> | <i>y</i> | <i>z</i> | <i>U</i> (iso) |
|-----|----------|----------|----------|----------------|
| H11 | 716      | 7820     | 4437     | 31             |
| H12 | -133     | 8206     | 5030     | 36             |
| H13 | -14      | 6686     | 6025     | 37             |
| H14 | 955      | 4770     | 6381     | 35             |
| H15 | 1771     | 4434     | 5749     | 30             |
| H21 | 3438     | 4037     | 4170     | 32             |
| H22 | 4087     | 3916     | 3380     | 37             |
| H23 | 3760     | 5712     | 2445     | 36             |
| H24 | 2802     | 7644     | 2350     | 39             |
| H25 | 2211     | 7732     | 3185     | 34             |
| H31 | 4064     | 7459     | 6773     | 33             |
| H32 | 4050     | 10469    | 6793     | 37             |
| H33 | 5000     | 11977    | 7500     | 37             |

**Table S4.** Anisotropic displacement parameters ( $\text{\AA}^2 \times 10^3$ ) of compound **1**. The anisotropic displacement factor exponent takes the form:  $-2\pi^2(h^2a^{*2}U_{11} + \dots + 2hka^*b^*U_{12})$ .

|     | $U_{11}$ | $U_{22}$ | $U_{33}$ | $U_{23}$ | $U_{13}$ | $U_{12}$ |
|-----|----------|----------|----------|----------|----------|----------|
| Ag1 | 27(1)    | 28(1)    | 25(1)    | -3(1)    | 15(1)    | -1(1)    |
| Cl1 | 23(1)    | 19(1)    | 20(1)    | 1(1)     | 8(1)     | 2(1)     |
| O1  | 25(1)    | 36(1)    | 32(1)    | -2(1)    | 2(1)     | 2(1)     |
| N1  | 22(1)    | 24(1)    | 25(1)    | -4(1)    | 10(1)    | -3(1)    |
| O2  | 28(1)    | 19(1)    | 77(2)    | 9(1)     | 13(1)    | 6(1)     |
| N2  | 26(1)    | 24(1)    | 21(1)    | -3(1)    | 10(1)    | -3(1)    |
| O3  | 54(1)    | 68(2)    | 26(1)    | -14(1)   | 15(1)    | -1(1)    |
| N3  | 35(2)    | 37(2)    | 44(2)    | 0        | 20(1)    | 0        |
| O4  | 38(1)    | 35(1)    | 37(1)    | 9(1)     | 13(1)    | -7(1)    |
| C11 | 24(1)    | 25(1)    | 30(1)    | -2(1)    | 8(1)     | -2(1)    |
| C12 | 24(1)    | 27(1)    | 41(1)    | -6(1)    | 11(1)    | 2(1)     |
| C13 | 29(1)    | 32(1)    | 37(1)    | -10(1)   | 20(1)    | -5(1)    |
| C14 | 31(1)    | 33(1)    | 27(1)    | -2(1)    | 14(1)    | -6(1)    |
| C15 | 23(1)    | 26(1)    | 29(1)    | -1(1)    | 10(1)    | -2(1)    |
| C21 | 29(1)    | 28(1)    | 23(1)    | 1(1)     | 9(1)     | 1(1)     |
| C22 | 29(1)    | 36(1)    | 31(1)    | -1(1)    | 14(1)    | 6(1)     |
| C23 | 33(1)    | 39(1)    | 22(1)    | -5(1)    | 15(1)    | -5(1)    |
| C24 | 37(1)    | 40(1)    | 22(1)    | 6(1)     | 12(1)    | 3(1)     |
| C25 | 30(1)    | 31(1)    | 27(1)    | 3(1)     | 11(1)    | 6(1)     |
| C31 | 23(1)    | 31(1)    | 28(1)    | -3(1)    | 7(1)     | -5(1)    |
| C32 | 28(1)    | 33(1)    | 28(1)    | 6(1)     | 4(1)     | 3(1)     |
| C33 | 34(2)    | 22(2)    | 36(2)    | 0        | 9(2)     | 0        |

**Table S5.** Bond lengths [Å] in compound **1**.

|           |          |          |          |
|-----------|----------|----------|----------|
| Ag1-N1    | 2.158(2) | Ag1-N2   | 2.161(2) |
| Cl1-O3    | 1.426(2) | Cl1-O1   | 1.435(2) |
| Cl1-O4    | 1.437(2) | Cl1-O2   | 1.438(2) |
| N1-C11    | 1.344(3) | N1-C15   | 1.345(3) |
| N2-C21    | 1.337(3) | N2-C25   | 1.340(3) |
| N3-C31    | 1.386(3) | N3-C31#1 | 1.386(3) |
| C11-C12   | 1.383(3) | C12-C13  | 1.379(4) |
| C13-C14   | 1.384(4) | C14-C15  | 1.382(3) |
| C21-C22   | 1.387(3) | C22-C23  | 1.379(4) |
| C23-C24   | 1.379(4) | C24-C25  | 1.386(3) |
| C31-C32   | 1.391(4) | C32-C33  | 1.386(3) |
| C33-C32#1 | 1.386(3) |          |          |

**Table S6.** Bond angles [°] in compound **1**.

|               |           |              |          |
|---------------|-----------|--------------|----------|
| N1-Ag1-N2     | 168.12(7) | O3-Cl1-O1    | 109.6(1) |
| O3-Cl1-O4     | 109.0(1)  | O1-Cl1-O4    | 109.9(1) |
| O3-Cl1-O2     | 110.1(1)  | O1-Cl1-O2    | 109.2(1) |
| O4-Cl1-O2     | 109.0(1)  | C11-N1-C15   | 118.0(2) |
| C11-N1-Ag1    | 120.6(2)  | C15-N1-Ag1   | 121.3(2) |
| C21-N2-C25    | 117.7(2)  | C21-N2-Ag1   | 121.2(2) |
| C25-N2-Ag1    | 121.0(2)  | C31-N3-C31#1 | 119.7(3) |
| N1-C11-C12    | 122.6(2)  | C13-C12-C11  | 119.1(2) |
| C12-C13-C14   | 118.6(2)  | C15-C14-C13  | 119.4(2) |
| N1-C15-C14    | 122.3(2)  | N2-C21-C22   | 122.7(2) |
| C23-C22-C21   | 119.1(2)  | C24-C23-C22  | 118.8(2) |
| C23-C24-C25   | 118.8(2)  | N2-C25-C24   | 122.9(2) |
| N3-C31-C32    | 120.1(2)  | C33-C32-C31  | 120.1(2) |
| C32-C33-C32#1 | 119.7(3)  |              |          |

Symmetry codes to generate equivalent atoms:

1. [2\_656] -x+1,y,-z+1/2+1

**Table S7.** Molecular geometry of the Agpy2ClO<sub>4</sub> dimer calculated using the M05 functional with LANL2DZ basis set and pseudopotential on Ag and the 6-31G(d,p) basis set on the rest of the atoms

56

scf done: -2805.341856

|    |           |   |           |           |
|----|-----------|---|-----------|-----------|
| Ag | 0.032981  | - | 1.091451  | -1.453787 |
| Ag | -0.032885 |   | 1.091096  | 1.454625  |
| N  | -2.260144 |   | -1.169590 | -1.565627 |
| N  | 2.327107  |   | -0.989331 | -1.605054 |
| N  | -2.327047 |   | 0.989444  | 1.605092  |
| N  | 2.260304  |   | 1.169287  | 1.565206  |
| C  | -2.983427 |   | -0.085453 | -1.882179 |
| C  | -4.374636 |   | -0.101127 | -1.908412 |
| C  | -5.037112 |   | -1.283093 | -1.592404 |
| C  | -4.287881 |   | -2.404211 | -1.247135 |
| C  | -2.901094 |   | -2.302349 | -1.242118 |
| C  | 3.074584  |   | -2.058521 | -1.294395 |
| C  | 4.464864  |   | -2.034890 | -1.334734 |

|    |           |           |           |
|----|-----------|-----------|-----------|
| C  | 5.101727  | -0.854403 | -1.704861 |
| C  | 4.328395  | 0.261840  | -2.009718 |
| C  | 2.943435  | 0.152839  | -1.945699 |
| C  | -2.943992 | -0.152347 | 1.945868  |
| C  | -4.329025 | -0.260821 | 2.009036  |
| C  | -5.101750 | 0.855571  | 1.703166  |
| C  | -4.464230 | 2.035658  | 1.332914  |
| C  | -3.073911 | 2.058774  | 1.293444  |
| C  | 2.900934  | 2.302393  | 1.242281  |
| C  | 4.287696  | 2.404575  | 1.247041  |
| C  | 5.037266  | 1.283400  | 1.591394  |
| C  | 4.375126  | 0.101069  | 1.906739  |
| C  | 2.983907  | 0.085094  | 1.880841  |
| O  | -0.036684 | -1.555862 | 1.309994  |
| O  | 0.036473  | 1.555658  | -1.309247 |
| Cl | -0.293455 | 3.012022  | -1.318714 |
| Cl | 0.293211  | 3.012242  | 1.319261  |
| O  | 1.669656  | -3.179540 | 1.786309  |
| O  | 0.180021  | -3.500775 | -0.074646 |
| O  | -0.657105 | -3.708120 | 2.174499  |
| O  | 0.657882  | 3.708042  | -2.172738 |
| O  | -0.181923 | 3.500391  | 0.075405  |
| O  | -1.669334 | 3.179367  | -1.787387 |
| H  | 2.299843  | 1.002211  | -2.158073 |
| H  | -2.430909 | 0.822870  | -2.108113 |
| H  | 2.431670  | -0.823522 | 2.106296  |
| H  | -2.300830 | -1.001852 | 2.159024  |
| H  | 4.781271  | 1.206033  | -2.290498 |
| H  | -4.915583 | 0.801744  | -2.168821 |
| H  | -4.782441 | -1.204718 | 2.289943  |
| H  | 4.916328  | -0.801869 | 2.166392  |
| H  | 6.185343  | -0.803273 | -1.749846 |
| H  | -6.121708 | -1.329198 | -1.609828 |
| H  | 6.121855  | 1.329744  | 1.608612  |
| H  | -6.185412 | 0.804839  | 1.747459  |
| H  | 5.026389  | -2.925997 | -1.077035 |
| H  | -4.761208 | -3.343542 | -0.984075 |
| H  | 4.760733  | 3.344192  | 0.984489  |
| H  | -5.025274 | 2.926847  | 1.074455  |
| H  | 2.533625  | -2.950965 | -0.993092 |
| H  | -2.274411 | -3.145144 | -0.961856 |
| H  | 2.274031  | 3.145238  | 0.962668  |
| H  | -2.532361 | 2.950813  | 0.991966  |

**Table S8.** Molecular geometry of the Agpy2ClO<sub>4</sub> dimer coordinated by two pyridine ligands at the O<sub>4</sub> atoms, calculated using the M05 functional with LANL2DZ basis set and pseudopotential on Ag and the 6-31G(d,p) basis set on the rest of the atoms

78

scf done: -3301.566349

|   |           |           |           |
|---|-----------|-----------|-----------|
| C | -1.817806 | -2.830522 | -1.593986 |
|---|-----------|-----------|-----------|

|     |           |            |           |
|-----|-----------|------------|-----------|
| N   | -2.293671 | -1.589459  | -1.405915 |
| C   | -3.595382 | -1.436971  | -1.114556 |
| C - | 4.475988  | -2.509125  | -1.009473 |
| C   | -3.979289 | - 3.792150 | -1.218322 |
| C   | -2.628379 | -3.957010  | -1.513883 |
| Ag  | -0.946131 | 0.245378   | -1.535626 |
| O   | 1.114176  | -1.505320  | -1.387636 |
| Cl  | 2.578640  | - 1.721086 | -1.279482 |
| O   | 3.271823  | - 0.702524 | -2.077041 |
| N   | 0.268614  | 2.163423   | -1.760796 |
| C   | 1.573811  | 2.140461   | -2.072646 |
| C   | 2.347820  | 3.295186   | -2.126606 |
| C   | 1.744796  | 4.518658   | -1.854490 |
| C   | 0.392620  | 4.544128   | -1.525524 |
| C   | -0.306963 | 3.343600   | -1.482610 |
| Ag  | 0.894794  | -0.203707  | 1.488842  |
| O   | -1.135907 | 1.599624   | 1.389204  |
| Cl  | -2.611351 | 1.677983   | 1.252701  |
| O   | -3.102682 | 2.892168   | 1.889008  |
| N   | 2.267285  | 1.637326   | 1.440439  |
| C   | 1.808175  | 2.872251   | 1.695403  |
| C   | 2.632922  | 3.991579   | 1.677213  |
| C   | 3.981744  | 3.826827   | 1.372986  |
| C   | 4.461883  | 2.550613   | 1.094102  |
| C   | 3.567725  | 1.485600   | 1.141811  |
| N   | -0.203976 | -2.196244  | 1.757959  |
| C   | 0.446875  | -3.338650  | 1.488562  |
| C   | -0.159496 | -4.585874  | 1.584996  |
| C   | -1.495539 | -4.651745  | 1.969051  |
| C   | -2.177224 | -3.468714  | 2.235115  |
| C   | -1.495399 | -2.261411  | 2.118198  |
| O   | -3.212344 | 0.487661   | 1.866815  |
| O   | -2.938470 | 1.698760   | -0.191836 |
| O   | 2.914415  | -3.060909  | -1.741445 |
| O   | 2.958375  | -1.572923  | 0.143998  |
| H   | -2.000459 | -1.316615  | 2.297857  |
| H   | 0.746645  | 2.953962   | 1.909353  |
| H   | -0.754590 | -2.909502  | -1.800751 |
| H   | 2.016802  | 1.167455   | -2.267718 |
| H   | -3.222723 | -3.467436  | 2.522142  |
| H   | 2.216155  | 4.968815   | 1.894908  |
| H   | 3.401553  | 3.222481   | -2.370778 |
| H   | -2.199084 | -4.939666  | -1.676482 |
| H   | -1.998376 | -5.610309  | 2.054729  |
| H   | 4.649731  | 4.682902   | 1.352844  |
| H   | -4.636843 | -4.653798  | -1.151192 |
| H   | 2.321283  | 5.438074   | -1.889973 |
| H   | 0.411009  | -5.479673  | 1.358286  |
| H   | 5.500114  | 2.351838   | 0.841139  |
| H   | -5.517225 | -2.311610  | -0.767958 |
| H   | -0.118081 | 5.472885   | -1.297007 |
| H   | 1.483167  | -3.240714  | 1.180179  |

|   |           |           |           |
|---|-----------|-----------|-----------|
| H | 3.893408  | 0.473680  | 0.923469  |
| H | -3.933840 | -0.418971 | -0.951580 |
| H | -1.356883 | 3.311634  | -1.206614 |
| C | -6.270283 | 0.286855  | 0.648898  |
| N | -7.055108 | -0.508829 | -0.085344 |
| C | -8.079399 | 0.066573  | -0.721287 |
| C | -8.363737 | 1.428489  | -0.657067 |
| C | -7.527895 | 2.243121  | 0.103309  |
| C | -6.454507 | 1.663776  | 0.771597  |
| H | -5.434596 | -0.184989 | 1.160544  |
| H | -5.762631 | 2.254024  | 1.363578  |
| H | -8.708257 | -0.593782 | -1.317253 |
| H | -9.213008 | 1.836893  | -1.194984 |
| H | -7.708775 | 3.311776  | 0.169930  |
| C | 6.216616  | -0.227784 | -0.696207 |
| N | 6.992257  | 0.546425  | 0.069567  |
| C | 8.019529  | -0.044103 | 0.686812  |
| C | 8.315509  | -1.400113 | 0.572290  |
| C | 7.489589  | -2.192243 | -0.221913 |
| C | 6.413618  | -1.596957 | -0.871190 |
| H | 5.378744  | 0.254900  | -1.193854 |
| H | 8.641466  | 0.598900  | 1.308606  |
| H | 9.166427  | -1.821521 | 1.097437  |
| H | 7.680087  | -3.255948 | -0.329017 |
| H | 5.729133  | -2.168310 | -1.489112 |

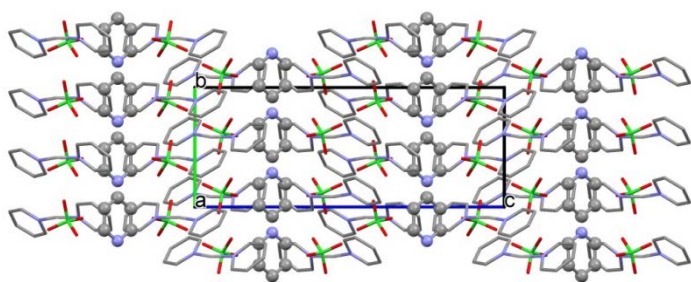

a.,

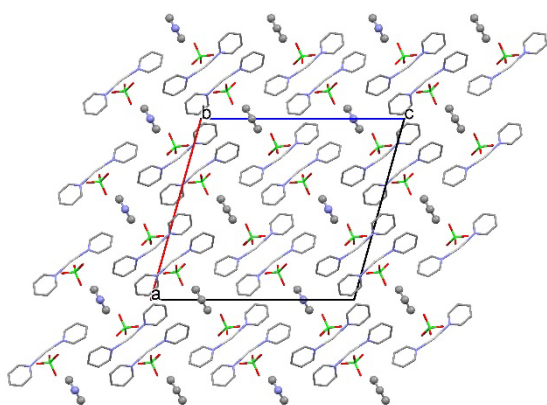

b.,

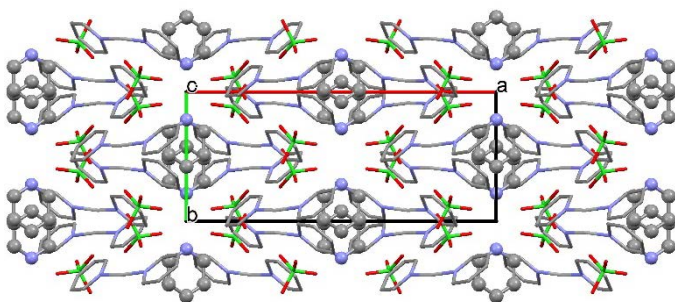

c.,

**Figure S2.** The packing arrangement of compound **1** (capped sticks) and the solvent pyridine (ball and stick representation). a., View from the *a* crystallographic axis. b., View from the *b* crystallographic axis. c., View from the *c* crystallographic axis.

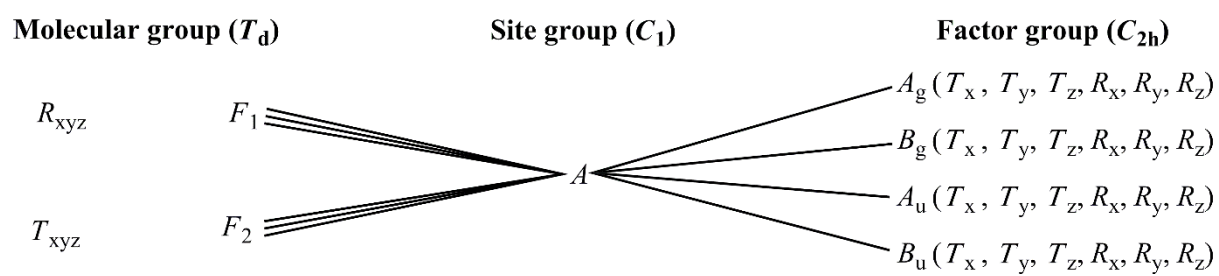

**Figure S3.** External vibrational modes of perchlorate ion in compound **1**.

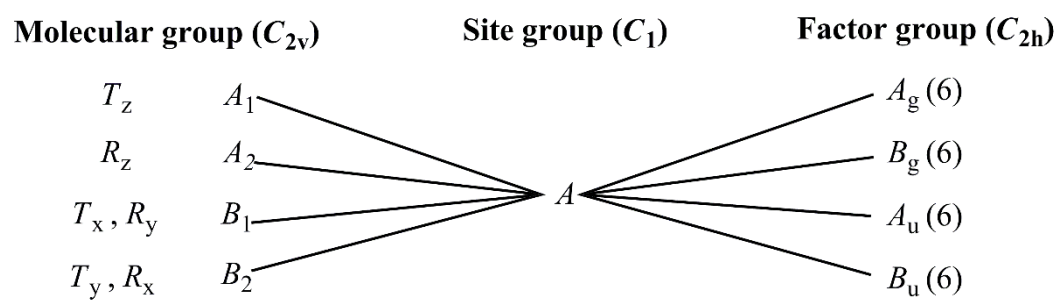

**Figure S4.** External vibrational modes of pyridines at C1 site (coordinated ones) in compound **1**.

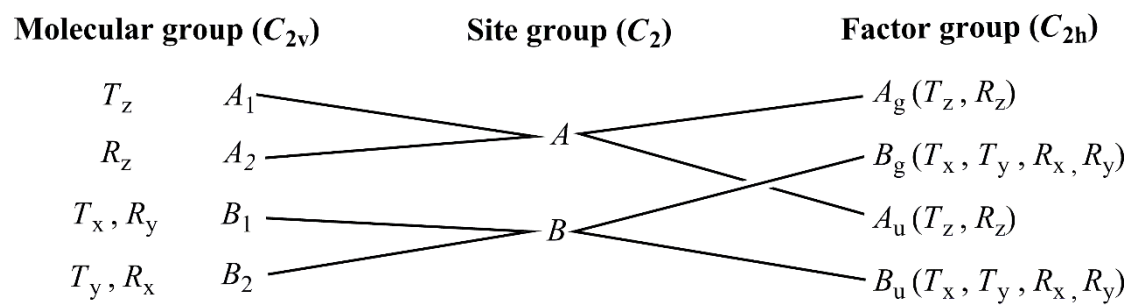

**Figure S5.** External vibrational modes of pyridine at C2 site (solvate) in compound **1**.

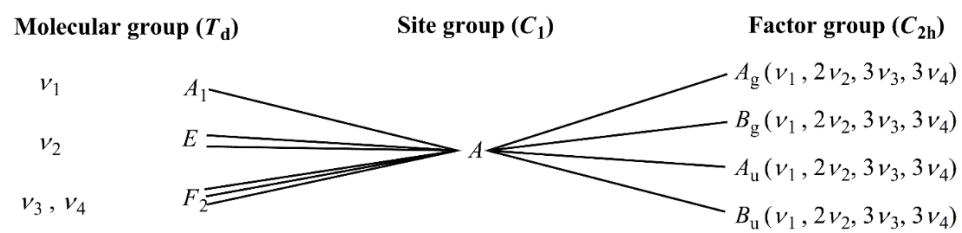

**Figure S6.** Correlation diagram for perchlorate ion internal modes in compound **1**.

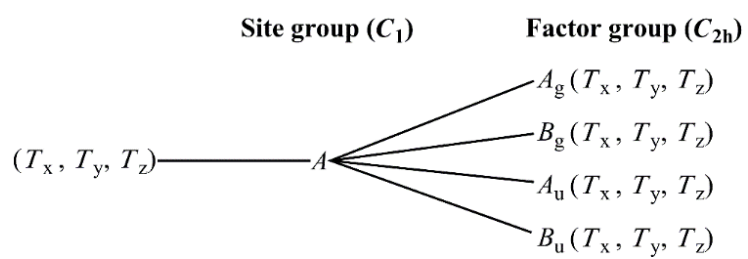

**Figure S7.** The correlation diagrams for the hindered translations of  $\text{Ag}^+$  cations at  $C_1$  sites.

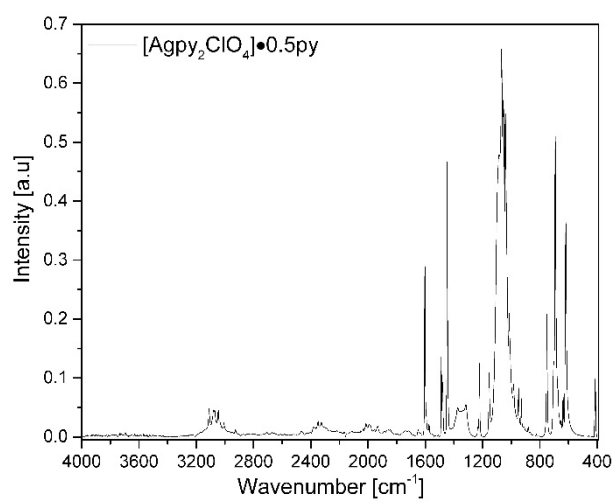

(a)

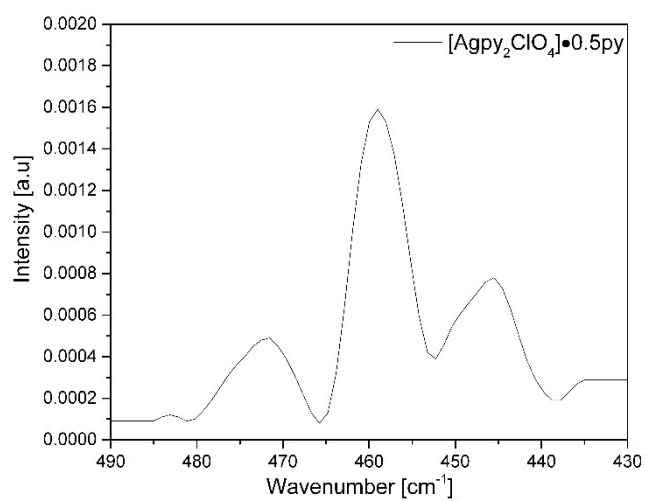

(b)

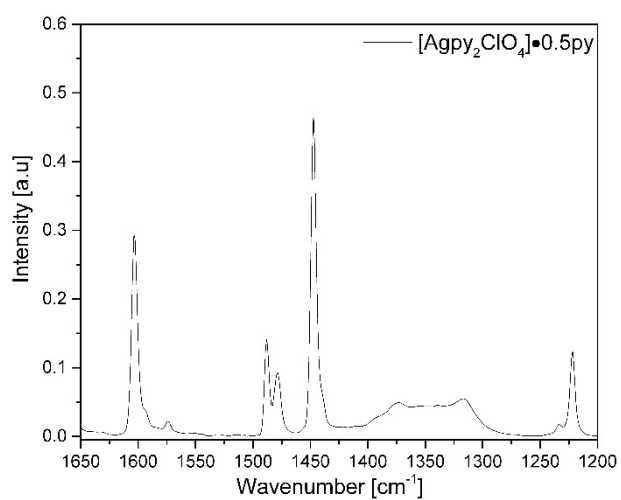

(c)

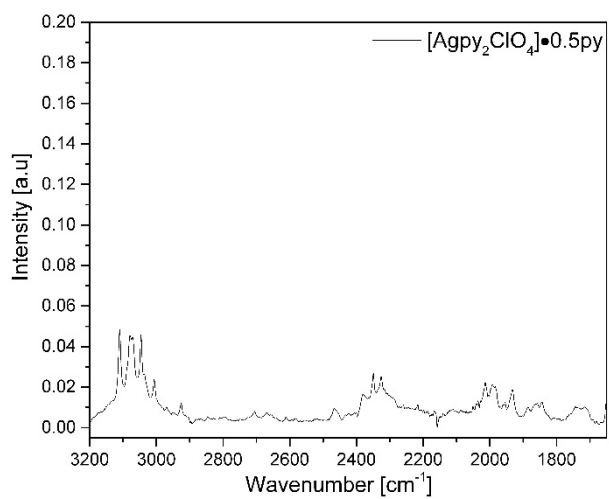

(d)

**Figure S8.** IR spectrum of compound **1** at room temperature between 4000 and 400  $\text{cm}^{-1}$  (a). The enlarged spectrum parts are given between 490 and 430  $\text{cm}^{-1}$  (b) and 1650 and 1200  $\text{cm}^{-1}$  (c), and 3200 and 1650  $\text{cm}^{-1}$  (d).

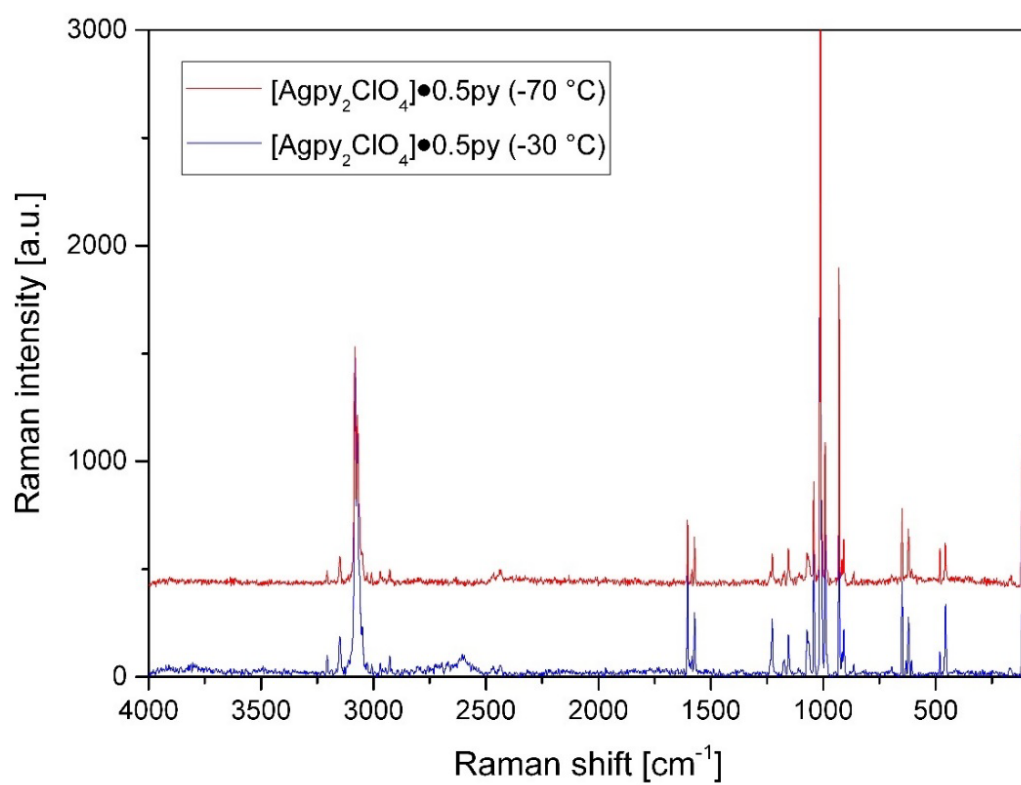

(a)

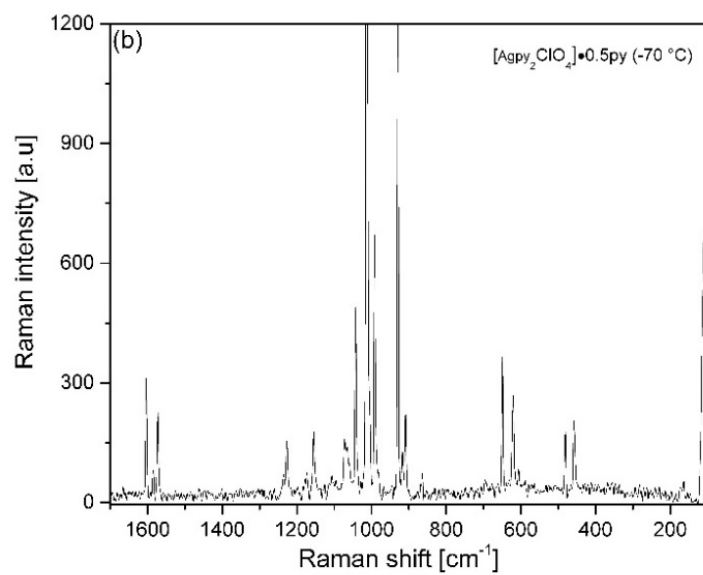

(b)

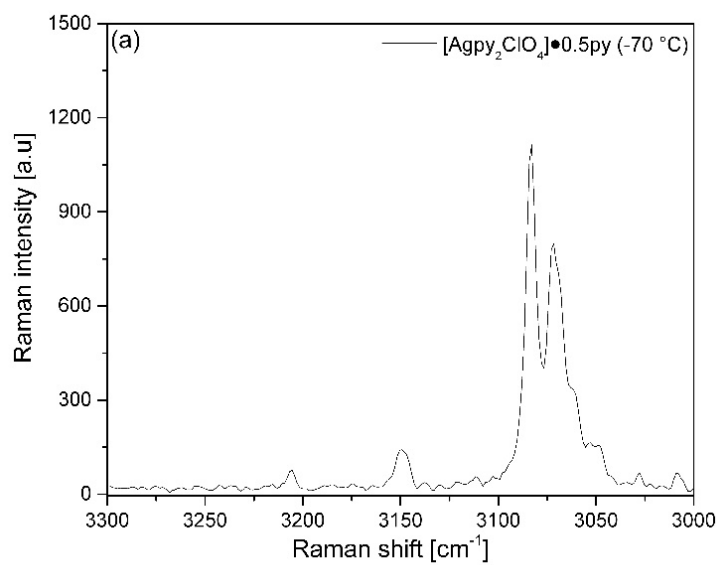

(c)

**Figure S9.** Raman spectra of compound **1** between 4000 and 100 cm<sup>-1</sup> at 243 and 203 K (a). The enlarged spectrum parts recorded at 203 K are given between 1700 and 100 cm<sup>-1</sup> (b), 3300-3000 cm<sup>-1</sup> (c).
